# Supplementary material for: Serum direct SMOS-qPCR: a fast approach for miRNAs detection
Source: Royal Society of Chemistry journal article supplement (doi:10.1039/d4ay02280g), 2025-01-01
Supplement: d4ay02280g1.pdf [file d4ay02280g1.pdf]

**Supplementary Table 1.** Oligonucleotides used in this study

| miRNA      | oligonucleotides | Sequence (5'-3')                                    |
|------------|------------------|-----------------------------------------------------|
| miR-16     | Sequences        | UAGCAGCACGUAAAUAUUGGCG                              |
|            | Primer-F         | GTACTGCATCATCGGTCTAC                                |
|            | Primer-R         | CCTACAGACTACGCCAATAT                                |
|            | Linker           | GTACTGCATCATCGGTCTACGTACCAGAGCCAAGTAGCAGCACGT-POOH  |
|            | Probe            | FAM-CAGAGCCAAGTAGC-MGB                              |
| cel-miR-39 | Sequences        | UCACCGGGUGUAAAUCAGCUUG                              |
|            | Primer-F         | GTACTGCATCATCGGTCTAC                                |
|            | Primer-R         | GAGTAACAACGCAAGCTGATTT                              |
|            | Linker           | GTACTGCATCATCGGTCTACGAACCAACTCAACATCACCGGGTGT-POOH  |
|            | Probe            | FAM-CCAAGTCAACATCA-MGB                              |
| miR-93     | Sequences        | CAAAGUGCUGUUCGUGCAGGUAG                             |
|            | Primer-F         | GTACTGCATCATCGGTCTAC                                |
|            | Primer-R         | TTACAGTGGTCCTACCTGCACG                              |
|            | Linker           | GTACTGCATCATCGGTCTACGAACTCTGACTCGCAAAGTGCTGTTC-POOH |
|            | Probe            | FAM-TCTGACTCGCAAAG-MGB                              |
| miR-21     | Sequences        | UAGCUUAUCAGACUGAUGUUGA                              |
|            | Primer-F         | GTACTGCATCATCGGTCTAC                                |
|            | Primer-R         | CTCAGCGTCTCAACATCAGT                                |
|            | Linker           | GTACTGCATCATCGGTCTACGAACATGTCCGCCTAGCTTATCAG-POOH   |
|            | Probe            | FAM-ATGTCCGCCTAGCT-MGB                              |

**Supplementary Table 2.** The results of LoD analysis for serum direct SMOS-qPCR

| Concentration                 | Replicates | Positive number (n) | Positive rate (%) |
|-------------------------------|------------|---------------------|-------------------|
| 6×10 <sup>3</sup> copies/μL   | 20         | 18                  | 90.0              |
| 3×10 <sup>3</sup> copies/μL   | 20         | 7                   | 35.0              |
| 1.5×10 <sup>3</sup> copies/μL | 20         | 1                   | 5.0               |

**Supplementary Table 3.** The Sanger sequencing results of  $6 \times 10^4$  copies/ $\mu\text{L}$  and  $6 \times 10^3$  copies/ $\mu\text{L}$  4-plex miRNAs with the treated serum as background.

| Sample                                      | ID               | Sequence (5'-3')                                                              |
|---------------------------------------------|------------------|-------------------------------------------------------------------------------|
| Reference                                   | Sense strand     | GTACTGCATCATCGGTCTACGAACTCTGACTCGCAAAGTGCTGTTTCGTGCAGGTAGGACCACTGTAA (miR-93) |
|                                             | Antisense strand | TTACAGTGGTCCTACCTGCACGAACAGCACTTTGCGAGTCAGAGTTCGTAGACCGATGATGCAGTAC (miR-93)  |
| $6 \times 10^4$ copies/ $\mu\text{L}$ Serum | 1#               |                                                                               |
|                                             | 2#               |                                                                               |
|                                             | 3#               |                                                                               |
|                                             | 4#               |                                                                               |

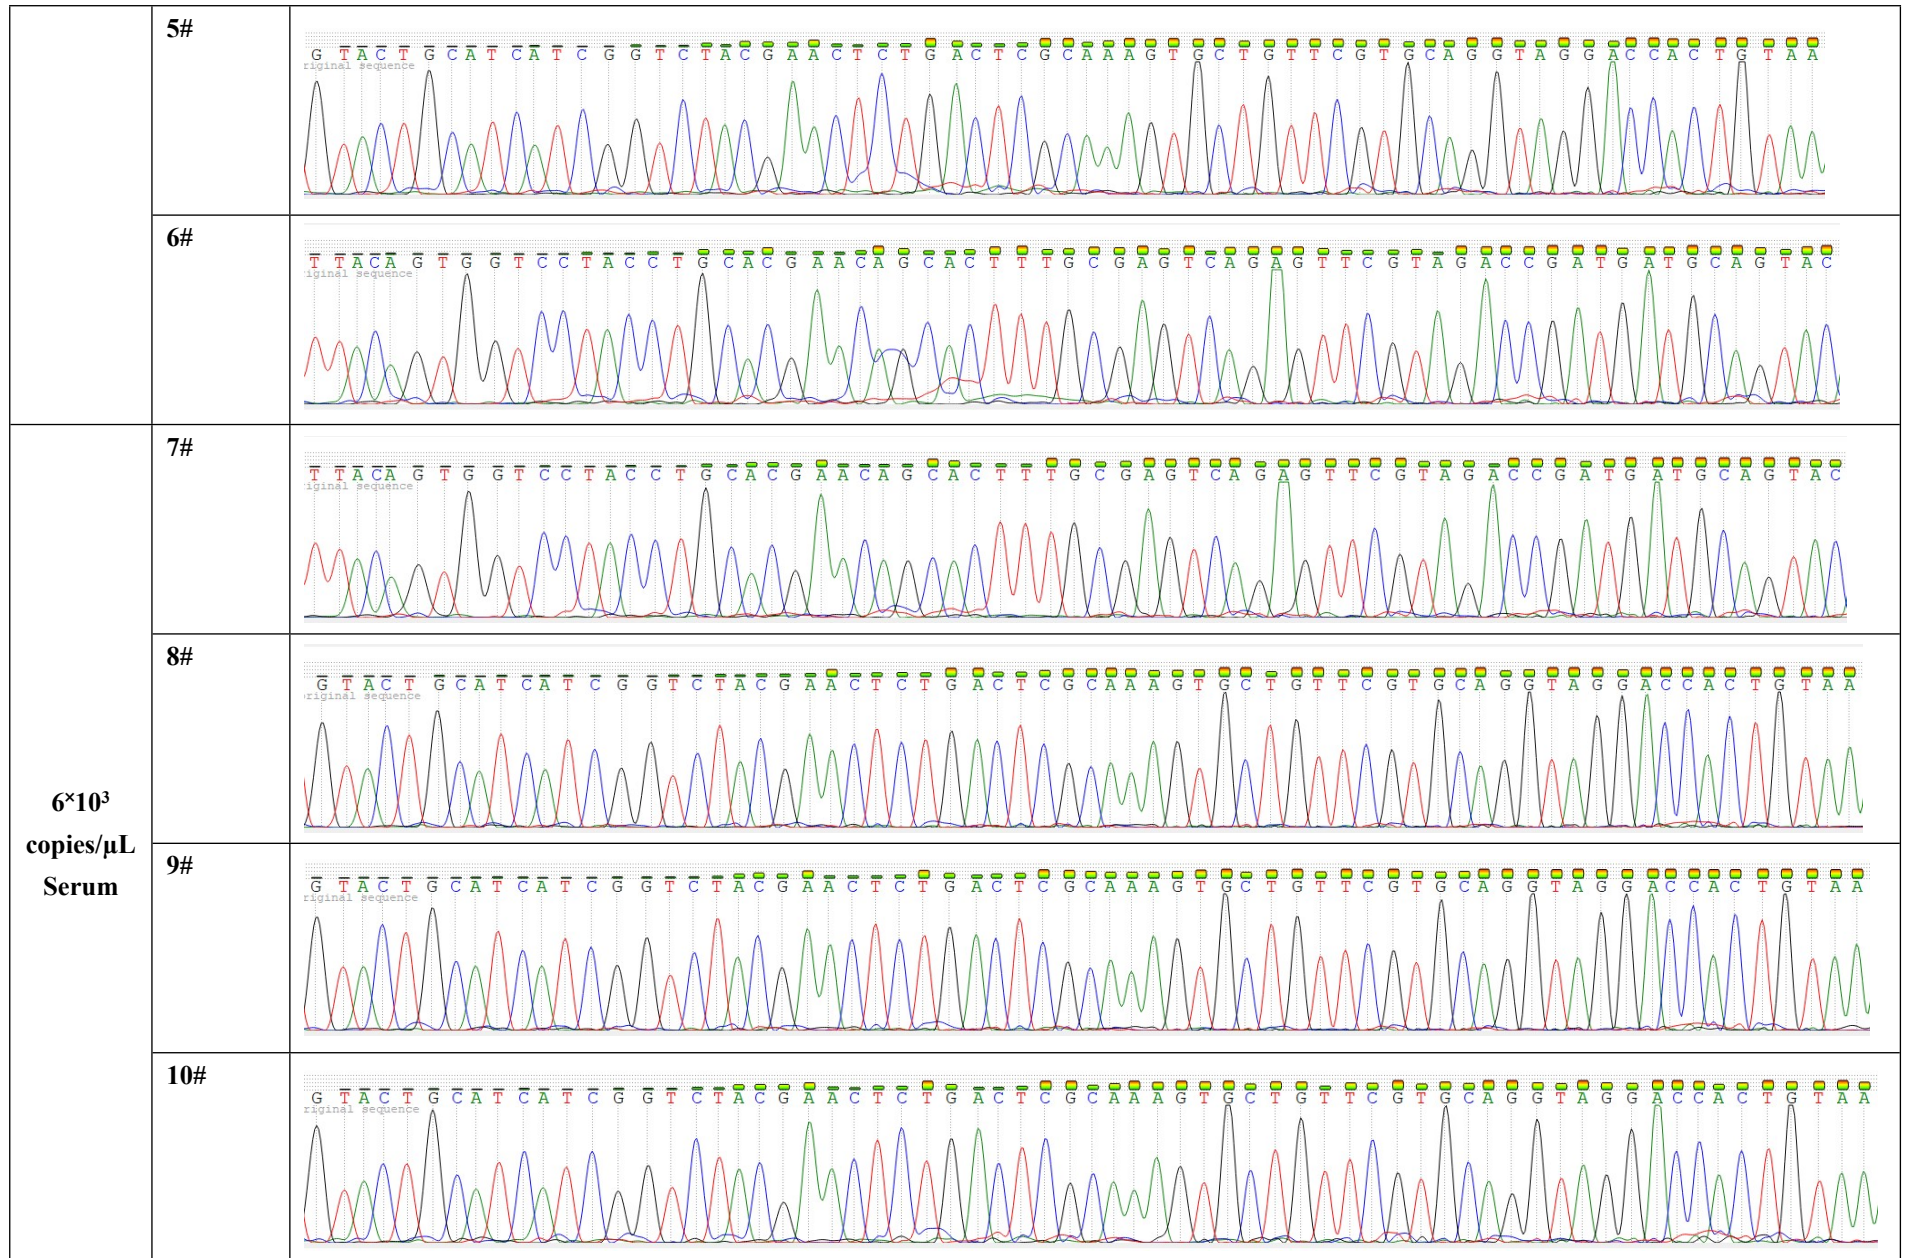

11#

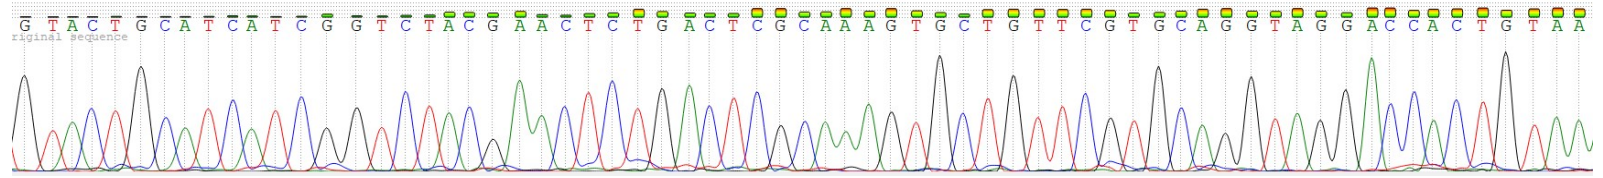

12#

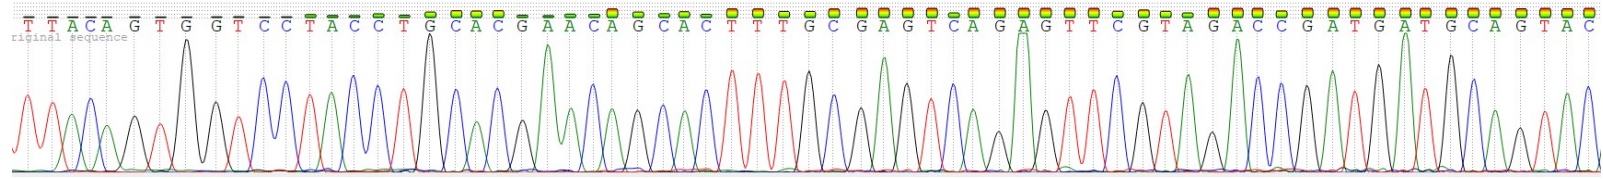

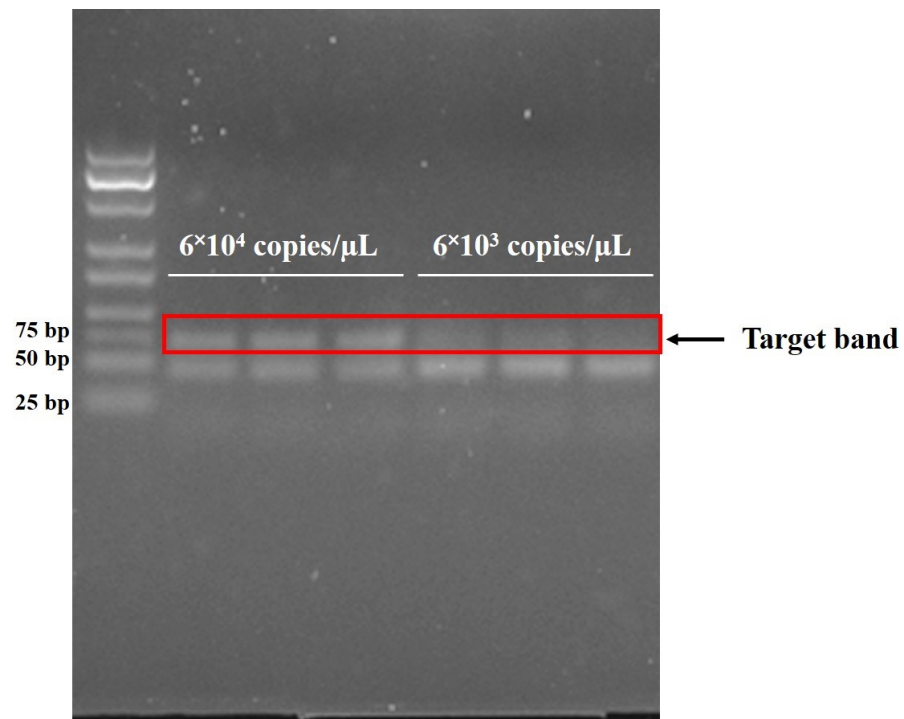

**Figure S1.** The agarose gel electrophoresis analysis for  $6 \times 10^4$  copies/ $\mu\text{L}$  and  $6 \times 10^3$  copies/ $\mu\text{L}$  4-plex miRNAs with the treated serum as background.
